# Supplementary material
Source: HighWire-hosted journal article supplement (https://msystems.asm.org/content/2/2/e00191-16)

**A**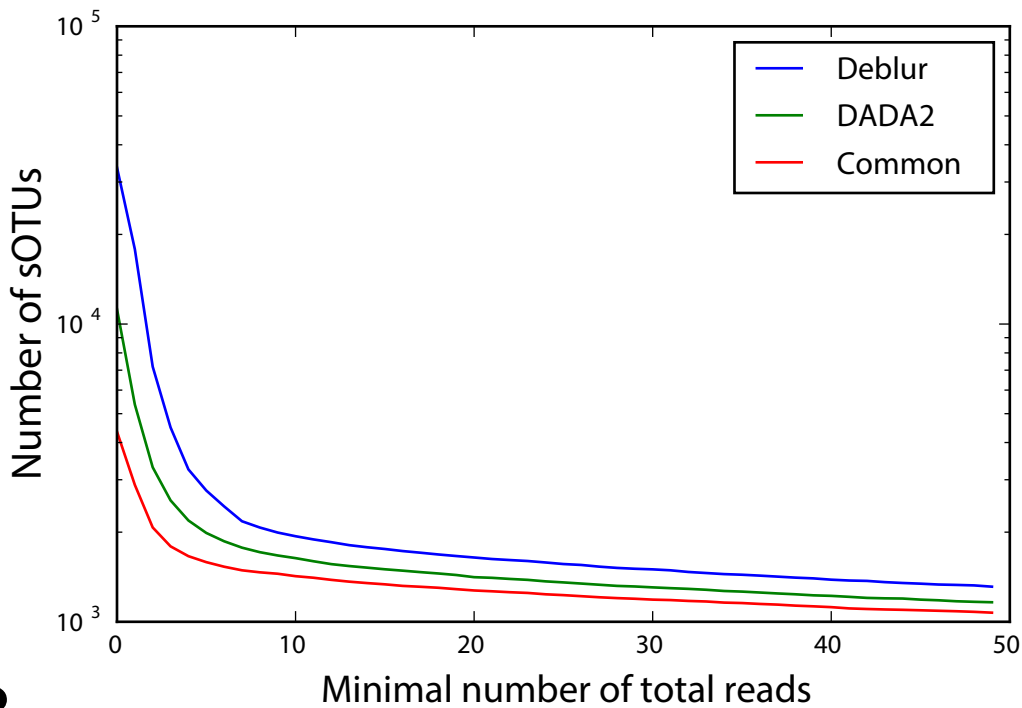**B**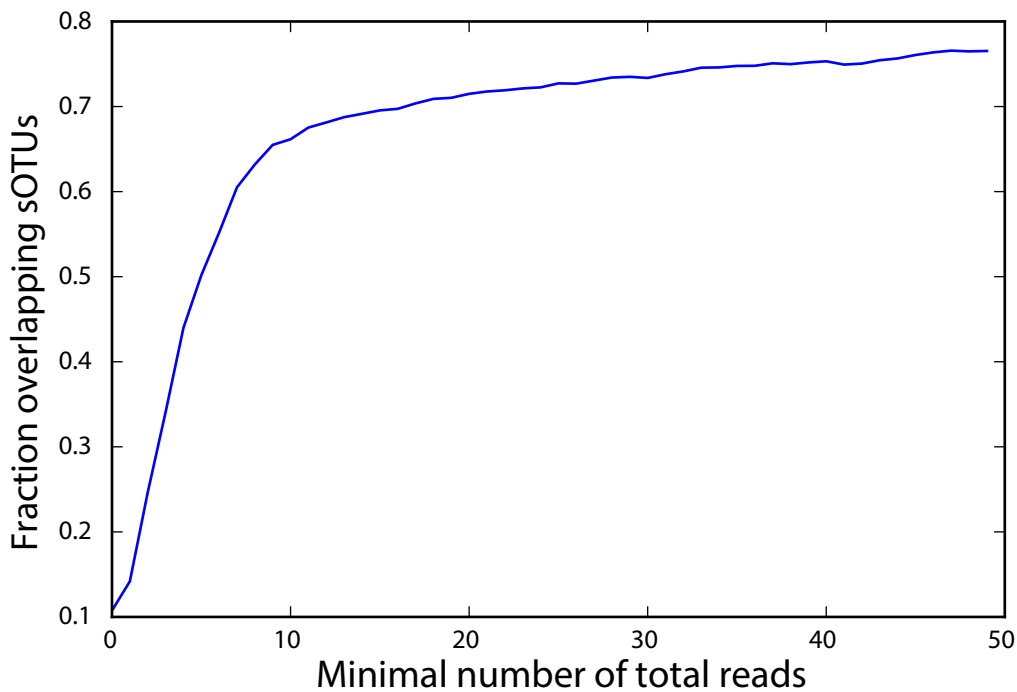

Supplement: inline-supplementary-material-5 [file inline-supplementary-material-5.pdf]
